# Supplementary material
Source: Springer Nature journal article supplement (https://www.springermedizin.de/resource/supplementary/13058_2010_2757_MOESM1_ESM.pdf/9702088)

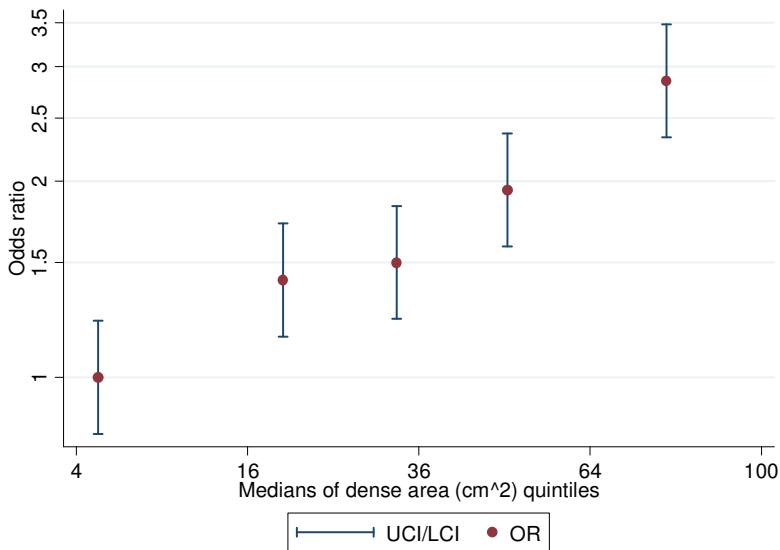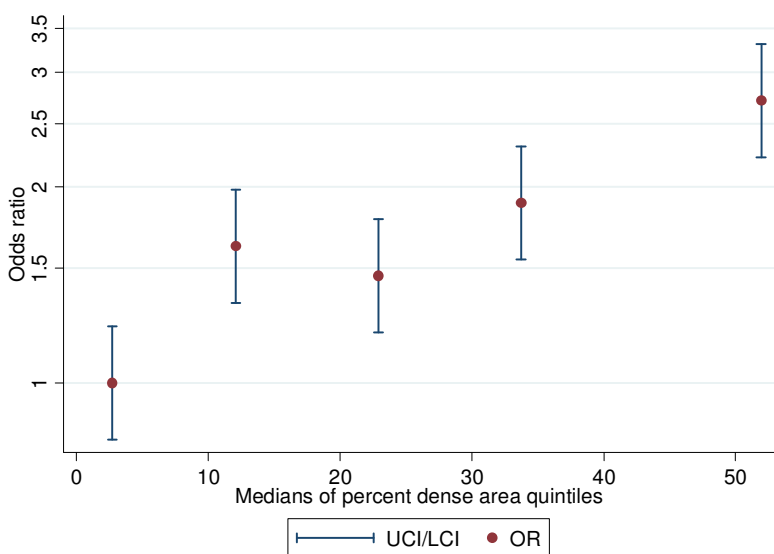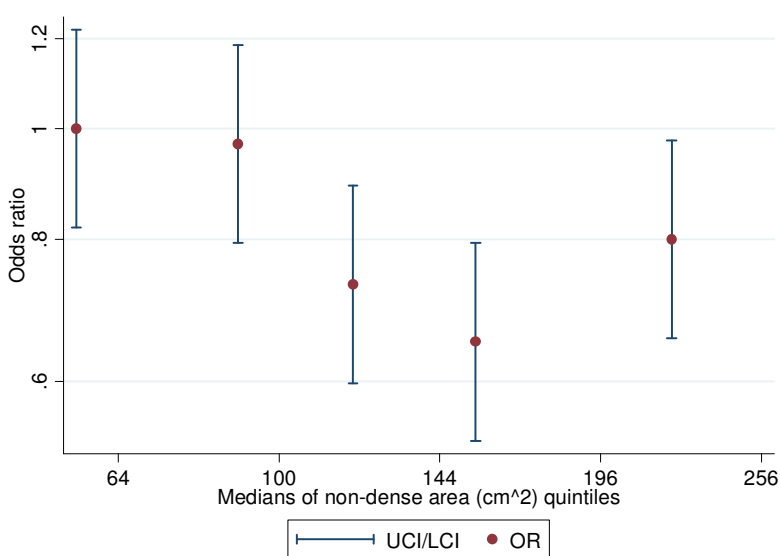

Supplement: MOESM1 [file 9702088]
